# Supplementary material for: Effect of genetically proxied use of PDE5 inhibitors on risk of CHD: A drug target Mendelian Randomization study
Source: Research Square preprint supplement (doi:10.21203/rs.3.rs-5236402/v1), 2024-10-22
Supplement: Supplementary file 1 [file 531fc547bae37d0b0be06e8a.docx]

Supplementary eFigures1-4

eFigureS1 Leave-one-out analysis of Effect of genetically proxied PDE5 inhibitors on risk of CHD


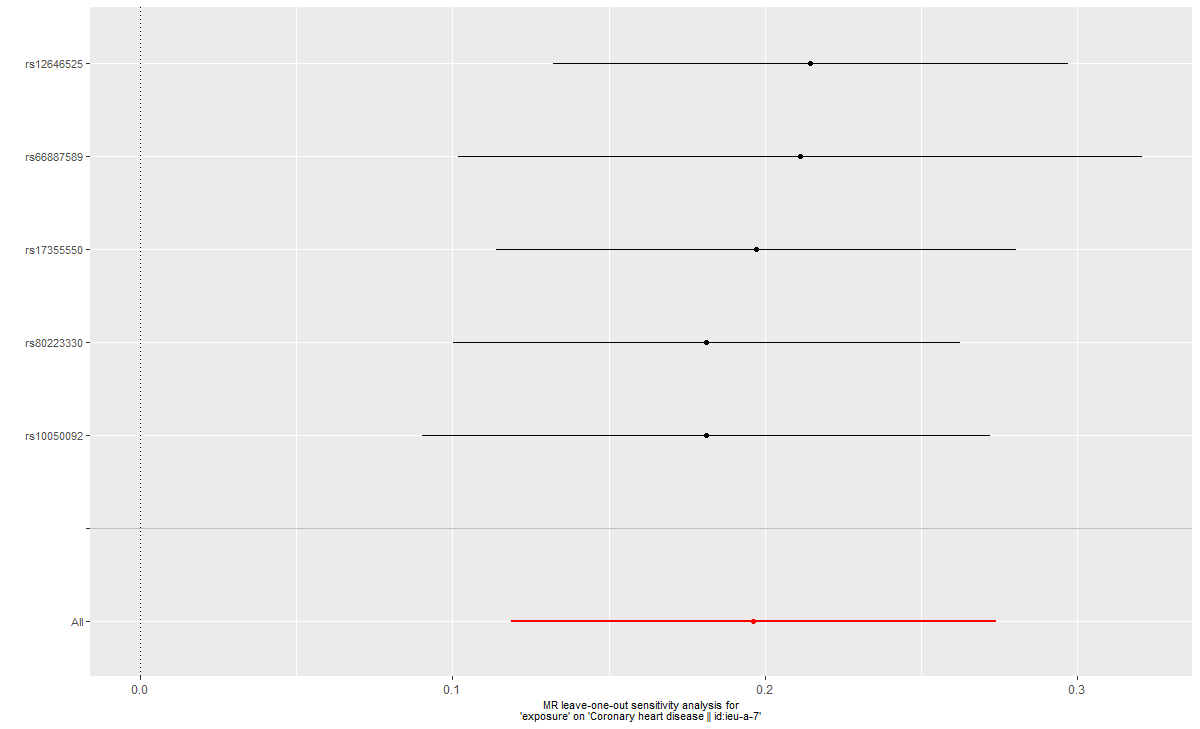


After removing each SNP, all error lines are on the right side of 0, indicating that the results are reliable.

eFigureS2 Leave-one-out analysis of Effect of genetically proxied PDE5 inhibitors on risk of Diabetes


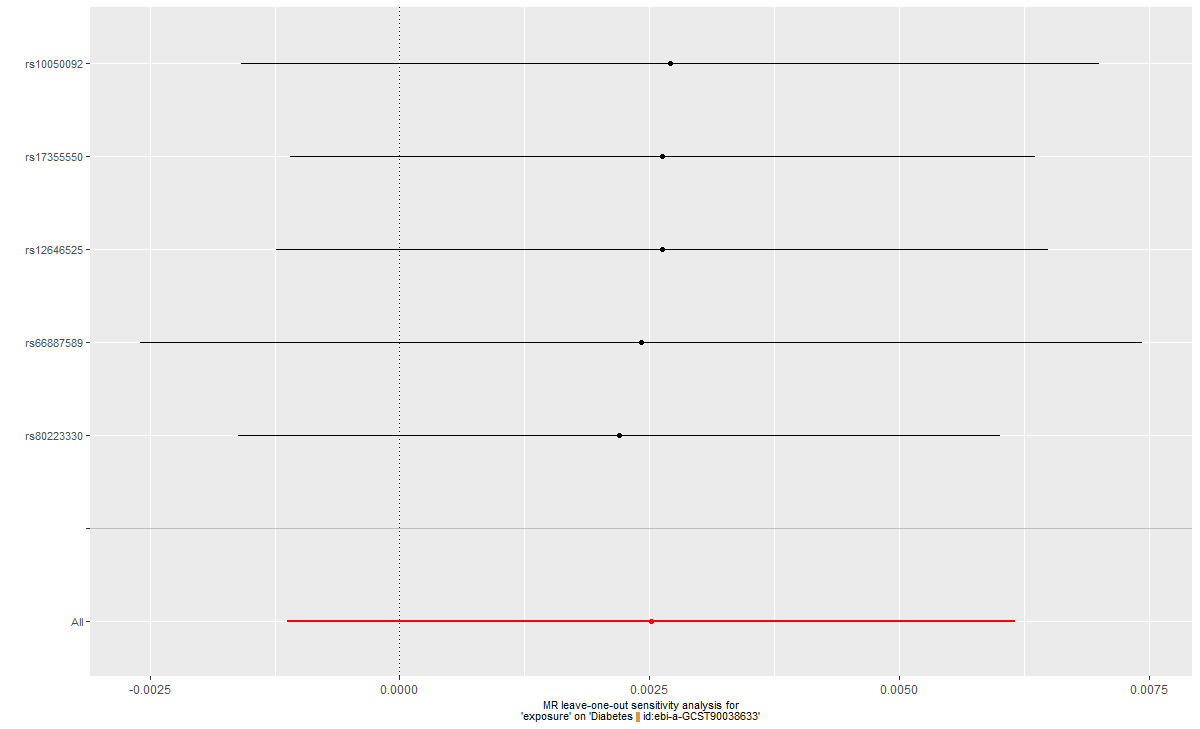


After removing each SNP, error lines are across the line of 0, indicating that the results are not reliable.

eFigureS3 Leave-one-out analysis of Effect of genetically proxied PDE5 inhibitors on risk of Breast cancer


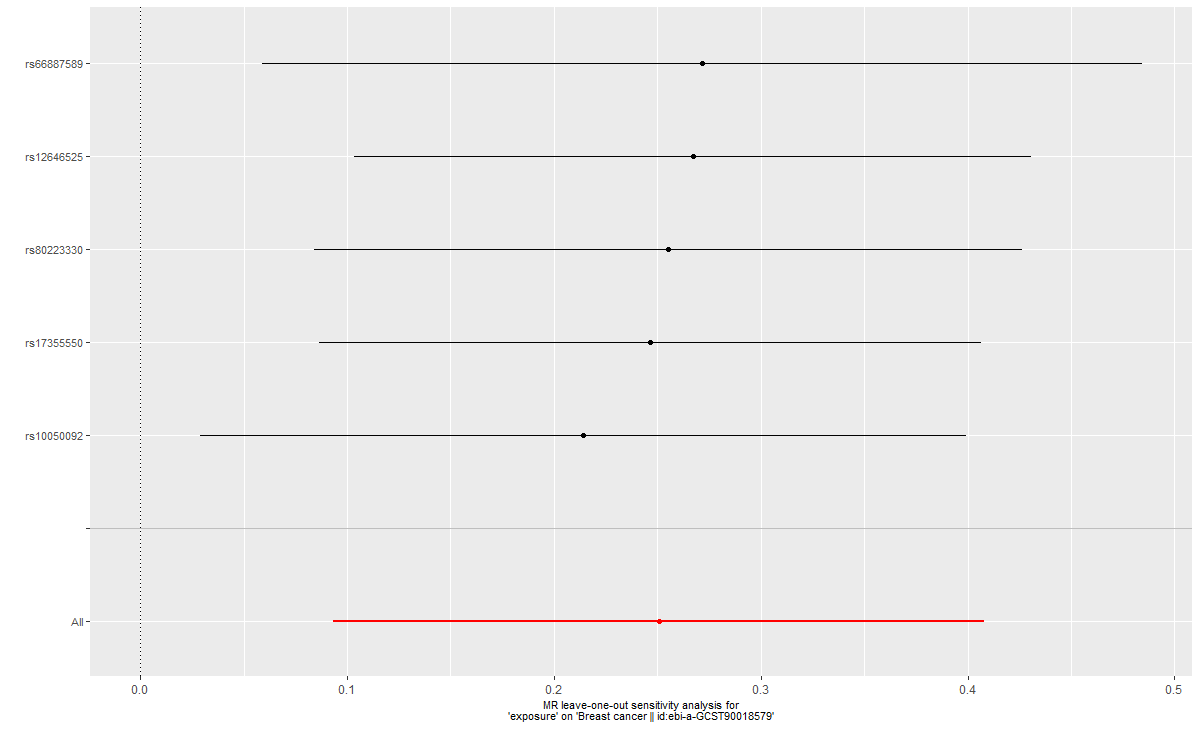


After removing each SNP, all error lines are on the right side of 0, indicating that the results are reliable.

eFigureS4 Leave-one-out analysis of Effect of genetically proxied PDE5 inhibitors on risk of Prostatic Cancer.


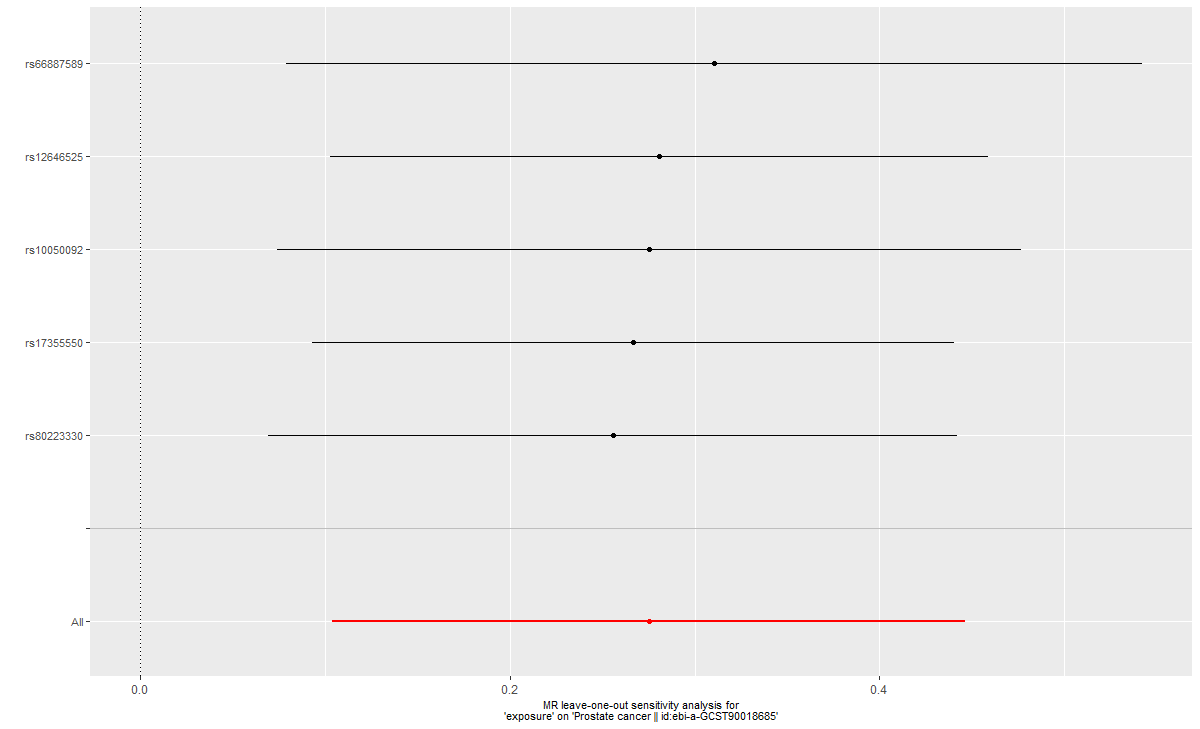


After removing each SNP, all error lines are on the right side of 0, indicating that the results are reliable.
