# Supplementary material for: Effect of genetically proxied use of PDE5 inhibitors on risk of CHD: A drug target Mendelian Randomization study
Source: Research Square preprint supplement (doi:10.21203/rs.3.rs-5236402/v1), 2024-10-22
Supplement: Supplementary file 2 [file 8df683148c21c26e525d029e.docx]

Supplementary Tables

eTableS1_IVs

| SNP | chr | location | effect_allele | other_allele | effect_allele_f | other_allele_f | beta | se | R2 | F |
| --- | --- | --- | --- | --- | --- | --- | --- | --- | --- | --- |
| rs10050092 | 4 | 120532085 | T | C | 0.338 | 0.131 | 0.018 | 8.62E-13 | 6.73E-05 | 51 |
| rs12646525 | 4 | 120502461 | C | T | 0.785 | 0.095 | 0.021 | 6.74E-06 | 2.67E-05 | 20 |
| rs17355550 | 4 | 120416096 | T | C | 0.033 | 0.144 | 0.05 | 4.07E-03 | 1.09E-05 | 8 |
| rs66887589 | 4 | 120509279 | C | T | 0.478 | 0.161 | 0.017 | 1.83E-20 | 1.13E-04 | 86 |
| rs80223330 | 4 | 120423094 | A | G | 0.141 | 0.102 | 0.027 | 1.21E-04 | 1.95E-05 | 15 |

eTableS2_MR Result

| Outcome | method | beta | se | OR | CI_low | CI_upper | p-value |
| --- | --- | --- | --- | --- | --- | --- | --- |
| Coronary heart disease | IVW | 0.20 | 0.04 | 1.22 | 1.14 | 1.29 | 7.16E-07 |
|  | MR Egger | 0.21 | 0.21 | 1.24 | 0.83 | 1.64 | 3.79E-01 |
|  | WM | 0.19 | 0.05 | 1.21 | 1.11 | 1.31 | 9.49E-05 |
|  | PWM | 0.19 | 0.05 | 1.21 | 1.11 | 1.31 | 1.17E-04 |
|  | ML | 0.20 | 0.04 | 1.22 | 1.14 | 1.30 | 2.75E-06 |
| Prostate cancer | IVW | 0.28 | 0.09 | 1.32 | 1.15 | 1.49 | 1.62E-03 |
|  | MR Egger | 0.14 | 0.44 | 1.15 | 0.28 | 2.01 | 7.76E-01 |
|  | WM | 0.25 | 0.10 | 1.29 | 1.09 | 1.49 | 1.46E-02 |
|  | PWM | 0.25 | 0.11 | 1.29 | 1.08 | 1.49 | 1.61E-02 |
|  | ML | 0.28 | 0.09 | 1.32 | 1.14 | 1.49 | 2.08E-03 |
| Breast cancer | IVW | 0.25 | 0.08 | 1.28 | 1.13 | 1.44 | 1.78E-03 |
|  | MR Egger | 0.38 | 0.41 | 1.46 | 0.66 | 2.25 | 4.22E-01 |
|  | WM | 0.23 | 0.10 | 1.25 | 1.06 | 1.45 | 2.29E-02 |
|  | PWM | 0.23 | 0.09 | 1.25 | 1.07 | 1.44 | 1.70E-02 |
|  | ML | 0.25 | 0.08 | 1.29 | 1.12 | 1.45 | 2.33E-03 |
| Diabetes | IVW | 0.003 | 0.002 | 1.003 | 0.999 | 1.006 | 1.76E-01 |
|  | MR Egger | 0.001 | 0.009 | 1.001 | 0.983 | 1.020 | 8.90E-01 |
|  | WM | 0.002 | 0.002 | 1.002 | 0.998 | 1.007 | 2.70E-01 |
|  | PWM | 0.002 | 0.002 | 1.002 | 0.998 | 1.006 | 2.63E-01 |
|  | ML | 0.003 | 0.002 | 1.003 | 0.999 | 1.006 | 1.77E-01 |

eTableS3_Replicate MR result

| Outcome | method | beta | se | OR | CI_low | CI_upper | p-value |
| --- | --- | --- | --- | --- | --- | --- | --- |
| Coronary heart disease | IVW | 0.21 | 0.06 | 1.23 | 1.11 | 1.36 | 9.02E-04 |
|  | MR Egger | 0.10 | 0.33 | 1.11 | 0.47 | 1.75 | 7.80E-01 |
|  | WM | 0.21 | 0.08 | 1.23 | 1.08 | 1.38 | 6.61E-03 |
|  | PWM | 0.21 | 0.07 | 1.23 | 1.08 | 1.37 | 5.58E-03 |
|  | ML | 0.21 | 0.07 | 1.24 | 1.11 | 1.36 | 1.27E-03 |
| Prostate cancer | IVW | 0.11 | 0.05 | 1.12 | 1.02 | 1.22 | 2.43E-02 |
|  | MR Egger | 0.05 | 0.25 | 1.05 | 0.56 | 1.54 | 8.66E-01 |
|  | WM | 0.12 | 0.06 | 1.13 | 1.01 | 1.25 | 3.79E-02 |
|  | PWM | 0.12 | 0.06 | 1.13 | 1.01 | 1.25 | 4.08E-02 |
|  | ML | 0.11 | 0.05 | 1.12 | 1.02 | 1.22 | 2.56E-02 |
| Breast cancer | IVW | 0.11 | 0.04 | 1.11 | 1.03 | 1.20 | 1.04E-02 |
|  | MR Egger | 0.09 | 0.21 | 1.09 | 0.68 | 1.50 | 7.10E-01 |
|  | WM | 0.11 | 0.05 | 1.12 | 1.02 | 1.21 | 2.78E-02 |
|  | PWM | 0.11 | 0.05 | 1.12 | 1.02 | 1.22 | 3.05E-02 |
|  | ML | 0.11 | 0.04 | 1.12 | 1.03 | 1.20 | 1.10E-02 |

eTableS4_Colocalization result

| exposure | outcome | PP.H0 | PP.H1 | PP.H2 | PP.H3 | PP.H4 |
| --- | --- | --- | --- | --- | --- | --- |
| diastolic blood pressure | Coronary heart disease | 2.74E-112 | 0.00054 | 5.27E-112 | 3.69E-05 | 0.999423 |
| diastolic blood pressure | Breast cancer | 3.02E-29 | 0.990317 | 2.96E-34 | 0 | 0.009683 |
| diastolic blood pressure | Prostate cancer | 3.02E-29 | 0.989368 | 3.25E-34 | 0 | 0.010632 |

eTableS5_heterogeneity test using Cochran’s Q statistic

| outcome | method | Q | Q_pval |
| --- | --- | --- | --- |
| Coronary heart disease | MR Egger | 3.268230253 | 0.352088935 |
|  | Inverse variance weighted | 3.275451747 | 0.512831094 |
| Prostate cancer | MR Egger | 0.549771882 | 0.907828311 |
|  | Inverse variance weighted | 0.651372633 | 0.957187467 |
| Breast cancer | MR Egger | 0.884568963 | 0.829149986 |
|  | Inverse variance weighted | 0.98391123 | 0.912225681 |
| Diabetes | MR Egger | 0.381288966 | 0.944080048 |
|  | Inverse variance weighted | 0.396257168 | 0.982782192 |

eTableS6_pleiotropy test

| outcome | egger_intercept | se | pval |
| --- | --- | --- | --- |
| Coronary heart disease | -0.002218269 | 0.027245603 | 0.940237553 |
| Prostate cancer | 0.018281283 | 0.057353272 | 0.770820265 |
| Breast cancer | -0.016629697 | 0.05276152 | 0.773272203 |
| Diabetes | 0.000149993 | 0.001225992 | 0.910361661 |

eTableS7_MR-PRESSO test

| Outcome | MR-PRESSO  Global Test P-value |
| --- | --- |
| Coronary heart disease | 0.662 |
| Breast cancer | 0.912 |
| Prostatic cancer | 0.957 |
| Diabetes | 0.99 |
